# Supplementary material
Source: Springer Nature journal article supplement (https://www.springermedizin.de/resource/supplementary/12957_2011_929_MOESM8_ESM.pdf/9561868)

**Figure 3a**

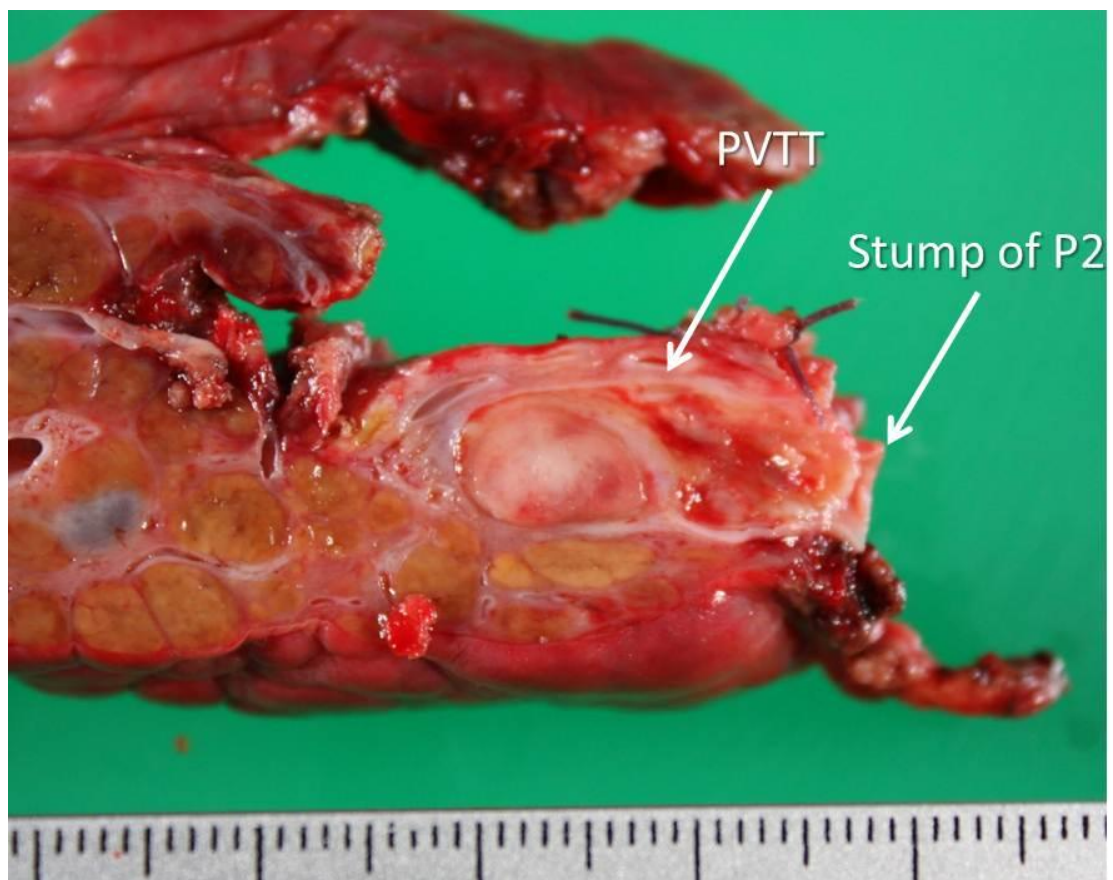

Supplement: MOESM8 [file 9561868]
